# Supplementary material for: Mitochondrial HSP70 Chaperone System—The Influence of Post-Translational Modifications and Involvement in Human Diseases
Source: MDPI journal article supplement (doi:10.3390/ijms22158077), 2021-07-28
Supplement: s1 [file s1]

# Mitochondrial HSP70 Chaperone System – the Influence of Post-translational Modifications and Involvement in Human Diseases

Havalová H., *et al.*

## Supplementary Table S1

**Table S1.** The overview of mortalin post-translational modifications and their involvement in human diseases, which appear in the PhosphositePlus® Database. Only modifications identified by at least five separate proteomic studies are listed.

| Modification    | Position | Localization in domain structure | Diseases                                                            | Tissue                                                                                                                                                                                                                                                                                                                                                                                                                                                                          |
|-----------------|----------|----------------------------------|---------------------------------------------------------------------|---------------------------------------------------------------------------------------------------------------------------------------------------------------------------------------------------------------------------------------------------------------------------------------------------------------------------------------------------------------------------------------------------------------------------------------------------------------------------------|
| Phosphorylation | S3       | MTS                              | breast cancer [1]                                                   | MCF10A1 (EP) [1], MCF10AT1K (EP) [1], MCF10CA1a (EP) [1], MCF10CA1h (EP) [1]                                                                                                                                                                                                                                                                                                                                                                                                    |
|                 | S5       | MTS                              | breast cancer [1]                                                   | MCF10A1 (EP) [1], MCF10AT1K (EP) [1], MCF10CA1a (EP) [1], MCF10CA1h (EP) [1]                                                                                                                                                                                                                                                                                                                                                                                                    |
|                 | T22      | MTS                              | breast cancer [1]                                                   | MCF10A1 (EP) [1], MCF10AT1K (EP) [1], MCF10CA1a (EP) [1], MCF10CA1h (EP) [1]                                                                                                                                                                                                                                                                                                                                                                                                    |
|                 | S29      | MTS                              | breast cancer [2]                                                   | breast [2], Jurkat (TL) [3]                                                                                                                                                                                                                                                                                                                                                                                                                                                     |
|                 | Y46      | MTS                              | lung cancer [4]                                                     | CL1-5 (PL) [4]                                                                                                                                                                                                                                                                                                                                                                                                                                                                  |
|                 | T87      | NBD                              | lung cancer [5]                                                     | DMS153 (PL), K562 (ERT) [6], lung [5], NCI-H1437 (PL), NCI-H2073 (PL), NCI-H209 (PL), NCI-H838 (PL)                                                                                                                                                                                                                                                                                                                                                                             |
|                 | Y128     | NBD                              | gastric cancer, leukemia, chronic myelogenous leukemia, lung cancer | A549 (PL), Cal-12T (PL), DMS153 (PL), HCC15 (PL), HCC44 (PL), HCC78 (PL), K562 (ERT), LOU-NH91 (SQ), lung, MKN-45 (GAS), NCI-H1299 (PL), NCI-H1355 (PL), NCI-H1437 (PL), NCI-H1666 (PL), NCI-H1703 (SQ), NCI-H1734 (PL), NCI-H1781 (PL), NCI-H1792 (PL), NCI-H1944 (PL), NCI-H2073 (PL), NCI-H209 (PL), NCI-H2228 (PL), NCI-H23 (PL), NCI-H2342 (PL), NCI-H2405 (PL), NCI-H3122 (PL), NCI-H3255 (PL), NCI-H358 (PL), NCI-H441 (PL), NCI-H460 (PL), NCI-H661 (PL), NCI-H838 (PL) |

|      |     |                                                                                                                                                  |                                                                                                                                                                                                                                                                                                                                                                                                                                                                                                                                                                                       |
|------|-----|--------------------------------------------------------------------------------------------------------------------------------------------------|---------------------------------------------------------------------------------------------------------------------------------------------------------------------------------------------------------------------------------------------------------------------------------------------------------------------------------------------------------------------------------------------------------------------------------------------------------------------------------------------------------------------------------------------------------------------------------------|
| S148 | NBD | breast cancer [2,7]                                                                                                                              | breast [2], BT-549 (BC) [7] , MDA-MB-231 (BC) [7]                                                                                                                                                                                                                                                                                                                                                                                                                                                                                                                                     |
| S162 | NBD | lung cancer [8]                                                                                                                                  | Jurkat (TL) [3], K562 (ERT) [6], PC9 (PL) [8], PC9-IR (PL) [8]                                                                                                                                                                                                                                                                                                                                                                                                                                                                                                                        |
| S164 | NBD | breast cancer [2], lung cancer [8]                                                                                                               | breast [2], Jurkat (TL), PC9-IR (PL) [8]                                                                                                                                                                                                                                                                                                                                                                                                                                                                                                                                              |
| S200 | NBD | breast cancer [2]                                                                                                                                | breast [2], HEK293T (EP) [9], HeLa (CER) [10,11], Jurkat (TL)                                                                                                                                                                                                                                                                                                                                                                                                                                                                                                                         |
| T271 | NBD | lung cancer                                                                                                                                      | A549 (PL), Cal-12T (PL), Calu-3 (PL), DMS153 (PL), DMS53 (PL), HCC15 (PL), HCC44 (PL), HCC78 (PL), HCC827 (PL), LOU-NH91 (SQ), lung, NCI-H1299 (PL), NCI-H1355 (PL), NCI-H1437 (PL), NCI-H1650 (PL), NCI-H1666 (PL), NCI-H1703 (SQ), NCI-H1734 (PL), NCI-H1781 (PL), NCI-H1792 (PL), NCI-H1944 (PL), NCI-H1975 (PL), NCI-H2073 (PL), NCI-H209 (PL), NCI-H2106 (PL), NCI-H2228 (PL), NCI-H23 (PL), NCI-H2342 (PL), NCI-H2405 (PL), NCI-H3122 (PL), NCI-H358 (PL), NCI-H441 (PL), NCI-H446 (PL), NCI-H460 (PL), NCI-H526 (PL), NCI-H661 (PL), NCI-H69 (PL), NCI-H82 (PL), NCI-H838 (PL) |
| S378 | NBD | erythroid leukemia [12], acute myeloblastic leukemia [12], lung cancer, B cell lymphoma [12], non-Hodgkin's lymphoma [12], multiple myeloma [12] | AML-193 (MN) [12], CMK (MGK) [12], CTS (MYE) [12], DOHH2 (BL, precursor) [12], HEL (ERT) [12], HeLa (CER) [10], Kasumi-1 (MYE) [12], KG-1 (MYE) [12], lung , MV4-11 (MP) [12], OPM-2 (PC) [12], P31/FUJ (ERT) [12], RL (BL, precursor) [12], RPMI-8266 (PC) [12], SU-DHL-6 (BL) [12], U266 (PC) [12], Vero E6-S (EP, KD) [13]                                                                                                                                                                                                                                                         |
| S408 | NBD | breast cancer [2]                                                                                                                                | breast [2], HeLa (CER) [11], K562 (ERT) [6]                                                                                                                                                                                                                                                                                                                                                                                                                                                                                                                                           |
| Y568 | SBD | cervical cancer [14], gastric cancer, leukemia, chronic myelogenous leukemia, liver                                                              | DMS153 (PL), HCC15 (PL), HCC78 (PL), HeLa S3 (CER) [14], K562 (ERT), liver, LOU-NH91 (SQ), lung, NCI-H1437 (PL), NCI-H1703 (SQ), NCI-H1781 (PL), NCI-H2073 (PL), NCI-H209 (PL),                                                                                                                                                                                                                                                                                                                                                                                                       |

|                              |      |     |                                                                                                                                          |                                                                                                                                                                                                                                                                                                                                                                                                                                                                                                                                                                                                                                                                                                                                                        |
|------------------------------|------|-----|------------------------------------------------------------------------------------------------------------------------------------------|--------------------------------------------------------------------------------------------------------------------------------------------------------------------------------------------------------------------------------------------------------------------------------------------------------------------------------------------------------------------------------------------------------------------------------------------------------------------------------------------------------------------------------------------------------------------------------------------------------------------------------------------------------------------------------------------------------------------------------------------------------|
|                              |      |     | cancer,<br>hepatocellular<br>carcinoma, lung<br>cancer                                                                                   | NCI-H2228 (PL), NCI-H2342<br>(PL), NCI-H3122 (PL), NCI-H661<br>(PL), NCI-H838 (PL), stomach                                                                                                                                                                                                                                                                                                                                                                                                                                                                                                                                                                                                                                                            |
|                              | S627 | SBD | breast cancer [2],<br>melanoma skin<br>cancer [15]                                                                                       | breast [2], MCF-7 (BC), WM239A<br>(MEL) [15]                                                                                                                                                                                                                                                                                                                                                                                                                                                                                                                                                                                                                                                                                                           |
| <b>Mono-<br/>methylation</b> | R513 | SBD | gastric cancer,<br>lung cancer                                                                                                           | 293 (EP) [16], A549 (PL), Cal-12T<br>(PL), Calu-3 (PL), DMS153 (PL),<br>DMS53 (PL), HCC15 (PL),<br>HCC44 (PL), HCC78 (PL),<br>HCC827 (PL), HCT116 (INT) [17],<br>Jurkat (TL) [18], LOU-NH91 (SQ),<br>lung, MKN-45 (GAS), NCI-H1299<br>(PL), NCI-H1355 (PL), NCI-<br>H1437 (PL), NCI-H1650 (PL),<br>NCI-H1666 (PL), NCI-H1703<br>(SQ), NCI-H1734 (PL), NCI-<br>H1781 (PL), NCI-H1792 (PL),<br>NCI-H1944 (PL), NCI-H1975<br>(PL), NCI-H2073 (PL), NCI-H209<br>(PL), NCI-H2106 (PL), NCI-<br>H2228 (PL), NCI-H23 (PL), NCI-<br>H2342 (PL), NCI-H2405 (PL),<br>NCI-H3122 (PL), NCI-H3255<br>(PL), NCI-H358 (PL), NCI-H441<br>(PL), NCI-H446 (PL), NCI-H460<br>(PL), NCI-H526 (PL), NCI-H661<br>(PL), NCI-H69 (PL), NCI-H82<br>(PL), NCI-H838 (PL), TL [18] |
| <b>Acetylation</b>           | K121 | NBD | lung cancer, B cell<br>lymphoma                                                                                                          | NCI-H2228 (PL), RC-K8 (BL)                                                                                                                                                                                                                                                                                                                                                                                                                                                                                                                                                                                                                                                                                                                             |
|                              | K135 | NBD | colorectal cancer,<br>leukemia, chronic<br>myelogenous<br>leukemia, liver<br>cancer,<br>hepatocellular<br>carcinoma, lung<br>cancer [19] | A549 (PL) [19,20], HCT116 (INT),<br>HeLa (CER) [21], HepG2 (HP),<br>Jurkat (TL) [3,20], K562 (ERT),<br>liver [22], MV4-11 (MP) [20], RC-<br>K8 (BL)                                                                                                                                                                                                                                                                                                                                                                                                                                                                                                                                                                                                    |
|                              | K138 | NBD | leukemia, chronic<br>myelogenous<br>leukemia, lung<br>cancer [19]                                                                        | A549 (PL) [19,20], HeLa (CER)<br>[21], Jurkat (TL) [3,20], K562<br>(ERT)                                                                                                                                                                                                                                                                                                                                                                                                                                                                                                                                                                                                                                                                               |
|                              | K159 | NBD | colorectal cancer,<br>gastric cancer,<br>leukemia, chronic                                                                               | HCT116 (INT), HeLa (CER) [21],<br>K562 (ERT), MKN-45 (gastric),                                                                                                                                                                                                                                                                                                                                                                                                                                                                                                                                                                                                                                                                                        |

|      |     |                                                                                                                     |                                                                                                                                                                                                                                                                                                                                                                                                                                                          |
|------|-----|---------------------------------------------------------------------------------------------------------------------|----------------------------------------------------------------------------------------------------------------------------------------------------------------------------------------------------------------------------------------------------------------------------------------------------------------------------------------------------------------------------------------------------------------------------------------------------------|
|      |     | myelogenous leukemia, lung cancer                                                                                   | NCI-H1703 (SQ), NCI-H2228 (PL)                                                                                                                                                                                                                                                                                                                                                                                                                           |
| K206 | NBD | not found                                                                                                           | HeLa (CER) [21], Jurkat (TL) [3]                                                                                                                                                                                                                                                                                                                                                                                                                         |
| K288 | NBD | colorectal cancer, leukemia, chronic myelogenous leukemia, liver cancer, lung cancer [19], ventricular tachycardia  | A549 (PL) [19,20], cardiac-heart, HCT116 (INT), HCT8/S11 (INT), HT-29 (INT), Jurkat (TL) [3,20], K562 (ERT), liver [22], MV4-11 (MP) [20], NCI-H2228 (PL), NCI-H716 (INT), OCI-ly3 (BL), RC-K8 (BL), SEM (BL), SNU-C2B (INT), SW480 (INT), SW620 (INT), UOK-101 (REN)                                                                                                                                                                                    |
| K291 | NBD | ventricular tachycardia                                                                                             | cardiac-heart                                                                                                                                                                                                                                                                                                                                                                                                                                            |
| K300 | NBD | colorectal cancer, leukemia, chronic myelogenous leukemia, liver cancer, hepatocellular carcinoma, lung cancer [19] | A549 (PL) [19,20], HCT116 (INT), HeLa (CER) [21], HepG2 (HP), Jurkat (TL) [3], K562 (ERT)                                                                                                                                                                                                                                                                                                                                                                |
| K345 | NBD | gastric cancer, lung cancer [19]                                                                                    | A549 (PL) [19], DMS79 (PL), Jurkat (TL) [20], lung, MKN-45 (GAS), NCI-H128 (PL), NCI-H1299 (PL), NCI-H1417 (PL), NCI-H1703 (SQ), NCI-H1734 (PL), NCI-H1944 (PL), NCI-H209 (PL), NCI-H358 (PL), NCI-H460 (PL), NCI-H524 (PL)                                                                                                                                                                                                                              |
| K567 | SBD | colorectal cancer, leukemia, chronic myelogenous leukemia, lung cancer                                              | A549 (PL) [20], Cal-12T (PL), Calu-3 (PL), DMS153 (PL), DMS53 (PL), DMS79 (PL), HCC15 (PL), HCC44 (PL), HCC827 (PL), HCT116 (INT), HeLa (CER) [21], Jurkat (TL) [3,20], K562 (ERT), LOU-NH91 (SQ), lung, MV4-11 (MP) [20], NCI-H128 (PL), NCI-H1299 (PL), NCI-H1355 (PL), NCI-H1417 (PL), NCI-H1437 (PL), NCI-H1650 (PL), NCI-H1666 (PL), NCI-H1703 (SQ), NCI-H1734 (PL), NCI-H1792 (PL), NCI-H1944 (PL), NCI-H1975 (PL), NCI-H2073 (PL), NCI-H209 (PL), |

|                |      |     |                                                                                                                                                                                                                                   |                                                                                                                                              |
|----------------|------|-----|-----------------------------------------------------------------------------------------------------------------------------------------------------------------------------------------------------------------------------------|----------------------------------------------------------------------------------------------------------------------------------------------|
|                |      |     | NCI-H2106 (PL), NCI-H2228 (PL), NCI-H23 (PL), NCI-H2342 (PL), NCI-H2405 (PL), NCI-H3255 (PL), NCI-H358 (PL), NCI-H441 (PL), NCI-H446 (PL), NCI-H460 (PL), NCI-H524 (PL), NCI-H526 (PL), NCI-H69 (PL), NCI-H82 (PL), NCI-H838 (PL) |                                                                                                                                              |
|                | K600 | SBD | liver cancer, lung cancer [19]                                                                                                                                                                                                    | A549 (PL) [19], HeLa (CER) [21], Jurkat (TL) [3], K562 (ERT), liver                                                                          |
|                | K612 | SBD | colorectal cancer, leukemia, chronic myelogenous leukemia, lung cancer [19]                                                                                                                                                       | A549 (PL) [19], HCT116 (INT), Jurkat (TL) [3], K562 (ERT)                                                                                    |
|                | K646 | SBD | gastric cancer, lung cancer                                                                                                                                                                                                       | A549 (PL) [20], lung, MKN-45 (GAS), NCI-H1299 (PL), NCI-H1703 (SQ), NCI-H1734 (PL), NCI-H1944 (PL), NCI-H358 (PL), NCI-H460 (PL), RC-K8 (BL) |
|                | K675 | SBD | leukemia, chronic myelogenous leukemia                                                                                                                                                                                            | K562 (ERT)                                                                                                                                   |
|                | K678 | SBD | kidney cancer, leukemia, chronic myelogenous leukemia                                                                                                                                                                             | K562 (ERT)                                                                                                                                   |
| Ubiquitylation | K121 | NBD | multiple myeloma                                                                                                                                                                                                                  | HEp-2 (SQ) [23], Jurkat (TL) [3,24], RPMI-8266 (PC)                                                                                          |

#### Abbreviations

|     |                |
|-----|----------------|
| BL  | B lymphocyte   |
| BC  | breast cell    |
| CER | cervical       |
| EP  | epithelial     |
| ERT | erythroid      |
| GAS | gastric        |
| HP  | hepatic        |
| INT | intestinal     |
| KD  | kidney         |
| MP  | macrophage     |
| MGK | megakaryoblast |
| MEL | melanocyte     |
| MN  | monocyte       |
| MYE | myeloid        |
| PC  | plasma cell    |

|     |              |
|-----|--------------|
| PL  | pulmonary    |
| REN | renal        |
| SQ  | squamous     |
| TL  | T lymphocyte |

## References:

1. Chen, Y.; Choong, L.Y.; Lin, Q.; Philp, R.; Wong, C.H.; Ang, B.K.; Tan, Y.L.; Loh, M.C.; Hew, C.L.; Shah, N., *et al.* Differential expression of novel tyrosine kinase substrates during breast cancer development. *Mol Cell Proteomics* **2007**, *6*, 2072-2087.
2. Mertins, P.; Mani, D.R.; Ruggles, K.V.; Gillette, M.A.; Clauser, K.R.; Wang, P.; Wang, X.; Qiao, J.W.; Cao, S.; Petralia, F., *et al.* Proteogenomics connects somatic mutations to signalling in breast cancer. *Nature* **2016**, *534*, 55-62.
3. Mertins, P.; Qiao, J.W.; Patel, J.; Udeshi, N.D.; Clauser, K.R.; Mani, D.R.; Burgess, M.W.; Gillette, M.A.; Jaffe, J.D.; Carr, S.A. Integrated proteomic analysis of post-translational modifications by serial enrichment. *Nat Methods* **2013**, *10*, 634-637.
4. Wu, H.Y.; Tseng, V.S.; Chen, L.C.; Chang, Y.C.; Ping, P.; Liao, C.C.; Tsay, Y.G.; Yu, J.S.; Liao, P.C. Combining alkaline phosphatase treatment and hybrid linear ion trap/orbitrap high mass accuracy liquid chromatography-mass spectrometry data for the efficient and confident identification of protein phosphorylation. *Anal Chem* **2009**, *81*, 7778-7787.
5. Schweppe, D.K.; Rigas, J.R.; Gerber, S.A. Quantitative phosphoproteomic profiling of human non-small cell lung cancer tumors. *J Proteomics* **2013**, *91*, 286-296.
6. Zhou, H.; Di Palma, S.; Preisinger, C.; Peng, M.; Polat, A.N.; Heck, A.J.; Mohammed, S. Toward a comprehensive characterization of a human cancer cell phosphoproteome. *J Proteome Res* **2013**, *12*, 260-271.
7. Klammer, M.; Kaminski, M.; Zedler, A.; Oppermann, F.; Blencke, S.; Marx, S.; Muller, S.; Tebbe, A.; Godl, K.; Schaab, C. Phosphosignature predicts dasatinib response in non-small cell lung cancer. *Mol Cell Proteomics* **2012**, *11*, 651-668.
8. Tsai, C.F.; Wang, Y.T.; Yen, H.Y.; Tsou, C.C.; Ku, W.C.; Lin, P.Y.; Chen, H.Y.; Nesvizhskii, A.I.; Ishihama, Y.; Chen, Y.J. Large-scale determination of absolute phosphorylation stoichiometries in human cells by motif-targeting quantitative proteomics. *Nat Commun* **2015**, *6*, 6622.
9. Matsuo, S.; Ballif, B.A.; Smogorzewska, A.; McDonald, E.R., 3rd; Hurov, K.E.; Luo, J.; Bakalarski, C.E.; Zhao, Z.; Solimini, N.; Lerenthal, Y., *et al.* Atm and atr substrate analysis reveals extensive protein networks responsive to DNA damage. *Science* **2007**, *316*, 1160-1166.
10. Kettenbach, A.N.; Schweppe, D.K.; Faherty, B.K.; Pechenick, D.; Pletnev, A.A.; Gerber, S.A. Quantitative phosphoproteomics identifies substrates and functional modules of aurora and polo-like kinase activities in mitotic cells. *Sci Signal* **2011**, *4*, rs5.
11. Sharma, K.; D'Souza, R.C.; Tyanova, S.; Schaab, C.; Wisniewski, J.R.; Cox, J.; Mann, M. Ultradeep human phosphoproteome reveals a distinct regulatory nature of tyr and ser/thr-based signaling. *Cell Rep* **2014**, *8*, 1583-1594.
12. Casado, P.; Alcolea, M.P.; Iorio, F.; Rodriguez-Prados, J.C.; Vanhaesebroeck, B.; Saez-Rodriguez, J.; Joel, S.; Cutillas, P.R. Phosphoproteomics data classify hematological cancer cell lines according to tumor type and sensitivity to kinase inhibitors. *Genome Biol* **2013**, *14*, R37.
13. Bouhaddou, M.; Memon, D.; Meyer, B.; White, K.M.; Rezeli, V.V.; Correa Marrero, M.; Polacco, B.J.; Melnyk, J.E.; Ulferts, S.; Kaake, R.M., *et al.* The global phosphorylation landscape of sars-cov-2 infection. *Cell* **2020**, *182*, 685-712 e619.
14. Olsen, J.V.; Vermeulen, M.; Santamaria, A.; Kumar, C.; Miller, M.L.; Jensen, L.J.; Gnad, F.; Cox, J.; Jensen, T.S.; Nigg, E.A., *et al.* Quantitative phosphoproteomics reveals widespread full phosphorylation site occupancy during mitosis. *Sci Signal* **2010**, *3*, ra3.
15. Stuart, S.A.; Houel, S.; Lee, T.; Wang, N.; Old, W.M.; Ahn, N.G. A phosphoproteomic comparison of b-rafv600e and mkk1/2 inhibitors in melanoma cells. *Mol Cell Proteomics* **2015**, *14*, 1599-1615.
16. Larsen, S.C.; Sylvestersen, K.B.; Mund, A.; Lyon, D.; Mullari, M.; Madsen, M.V.; Daniel, J.A.; Jensen, L.J.; Nielsen, M.L. Proteome-wide analysis of arginine monomethylation reveals widespread occurrence in human cells. *Sci Signal* **2016**, *9*, rs9.
17. Guo, A.; Gu, H.; Zhou, J.; Mulhern, D.; Wang, Y.; Lee, K.A.; Yang, V.; Aguiar, M.; Kornhauser, J.; Jia, X., *et al.* Immunoaffinity enrichment and mass spectrometry analysis of protein methylation. *Mol Cell Proteomics* **2014**, *13*, 372-387.
18. Geoghegan, V.; Guo, A.; Trudgian, D.; Thomas, B.; Acuto, O. Comprehensive identification of arginine methylation in primary t cells reveals regulatory roles in cell signalling. *Nat Commun* **2015**, *6*, 6758.

19. Wu, Q.; Cheng, Z.; Zhu, J.; Xu, W.; Peng, X.; Chen, C.; Li, W.; Wang, F.; Cao, L.; Yi, X., *et al.* Suberoylanilide hydroxamic acid treatment reveals crosstalks among proteome, ubiquitylome and acetylome in non-small cell lung cancer a549 cell line. *Sci Rep* **2015**, *5*, 9520.
20. Choudhary, C.; Kumar, C.; Gnad, F.; Nielsen, M.L.; Rehman, M.; Walther, T.C.; Olsen, J.V.; Mann, M. Lysine acetylation targets protein complexes and co-regulates major cellular functions. *Science* **2009**, *325*, 834-840.
21. Weinert, B.T.; Scholz, C.; Wagner, S.A.; Iesmantavicius, V.; Su, D.; Daniel, J.A.; Choudhary, C. Lysine succinylation is a frequently occurring modification in prokaryotes and eukaryotes and extensively overlaps with acetylation. *Cell Rep* **2013**, *4*, 842-851.
22. Zhao, S.; Xu, W.; Jiang, W.; Yu, W.; Lin, Y.; Zhang, T.; Yao, J.; Zhou, L.; Zeng, Y.; Li, H., *et al.* Regulation of cellular metabolism by protein lysine acetylation. *Science* **2010**, *327*, 1000-1004.
23. Akimov, V.; Barrio-Hernandez, I.; Hansen, S.V.F.; Hallenborg, P.; Pedersen, A.K.; Bekker-Jensen, D.B.; Puglia, M.; Christensen, S.D.K.; Vanselow, J.T.; Nielsen, M.M., *et al.* Ubisite approach for comprehensive mapping of lysine and n-terminal ubiquitination sites. *Nat Struct Mol Biol* **2018**, *25*, 631-640.
24. Udeshi, N.D.; Svinkina, T.; Mertins, P.; Kuhn, E.; Mani, D.R.; Qiao, J.W.; Carr, S.A. Refined preparation and use of anti-diglycine remnant (k-epsilon-gg) antibody enables routine quantification of 10,000s of ubiquitination sites in single proteomics experiments. *Mol Cell Proteomics* **2013**, *12*, 825-831.
